# Supplementary material
Source: PubMed Central journal article supplement (PMC6921604)
Supplement: ao9b03463_si_001.pdf [file ao9b03463_si_001.pdf]

## Supplementary information

For: Fast and quantitative phospholipidomic analysis of SH-SY5Y neuroblastoma cell cultures using LC-MS/MS and  $^{31}\text{P}$  NMR  
**Martin Jakubec<sup>1</sup>, Espen Bariås<sup>1</sup>, Fedor Kryuchkov<sup>2</sup>, Linda Veka Hjørnevik<sup>1</sup>, Øyvind Halskau<sup>1\*</sup>**

<sup>1</sup>University of Bergen Faculty of Mathematics and Natural Sciences, Department of Biological Sciences, PB 7803, Bergen, NO 5020.

<sup>2</sup> Norwegian University of Life Sciences Faculty of Veterinary and Biosciences, Ullevålsveien 68, Oslo, Akershus, NO 0033.

\*To whom correspondence should be addressed, email: oyvind.halskau@uib.no

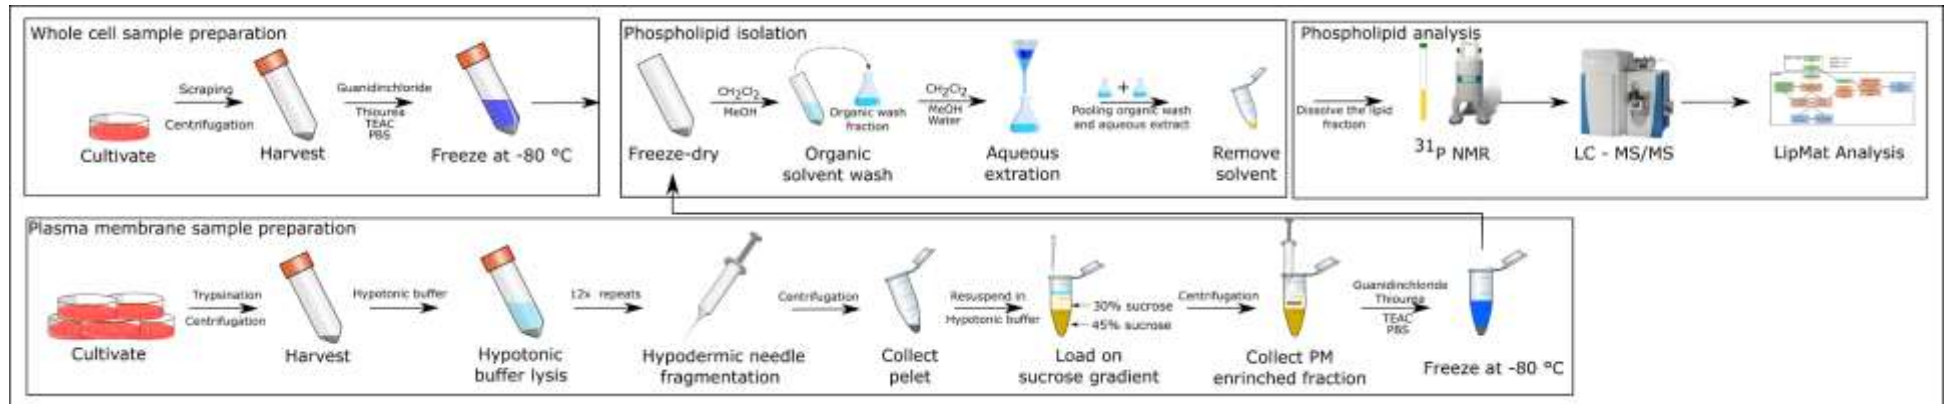

**Figure S1:** Graphical representation of methodology used for the whole cell and plasma membrane phospholipid isolation. For plasma membrane isolation modified sucrose gradient protocol has been used (see Methodology in main text).

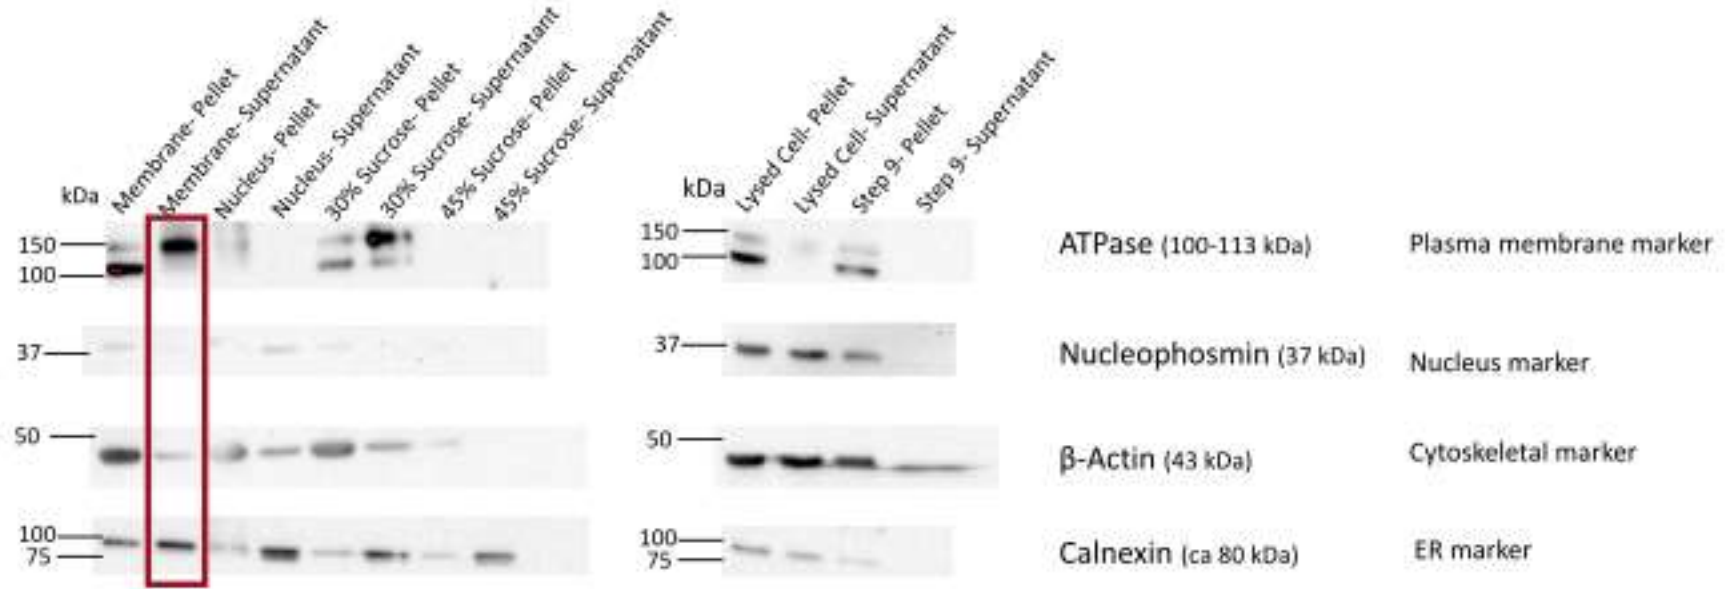

**Figure S2:** Western blot analysis of the purity of isolated plasma membrane fractions. The samples were fractionated on a 10 % SDS-PAGE. Antibodies for Na<sup>+</sup>/K<sup>+</sup>-ATPase (plasma membrane marker), Nucleophosmin (Nucleus marker), Calnexin (ER marker) and β-actin (cytosolic marker) were used to assess the purity of each fraction isolated. The plasma membrane enriched sample is the supernatant from the last centrifugation step and is indicated by a red rectangle. For comparison, results from other purification steps are included.

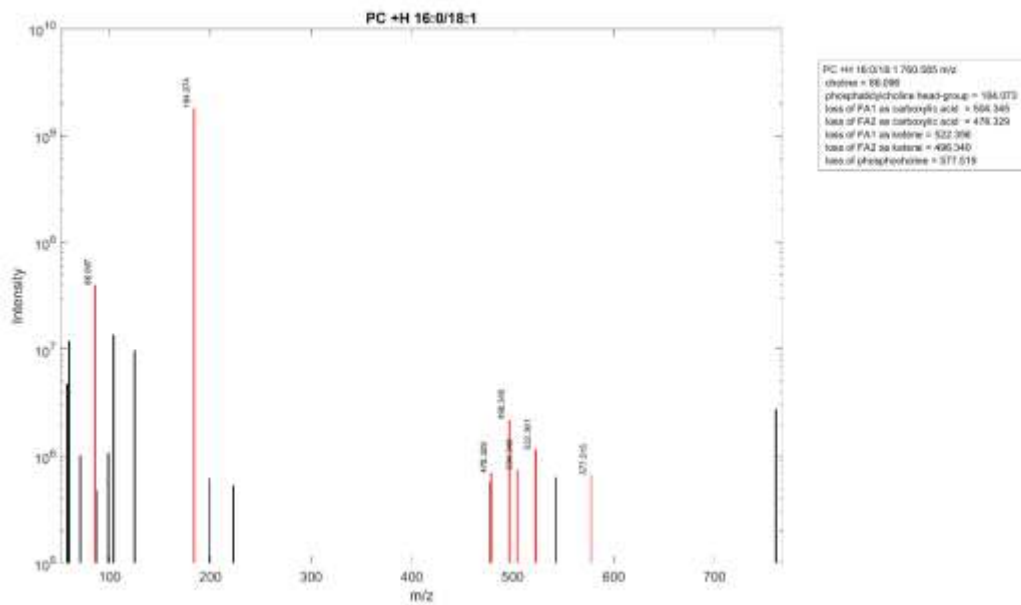

**Figure S3:** Example of LipMat fragmentation output. MS/MS fragmentation of PC +H 16:0/18:1 from whole cell SH-SY5Y samples. Observed peaks which correspond with predicted fragments are marked in red and their m/z values are listed in the figure. The table on the right lists the names of identified fragments and their corresponding m/z values.

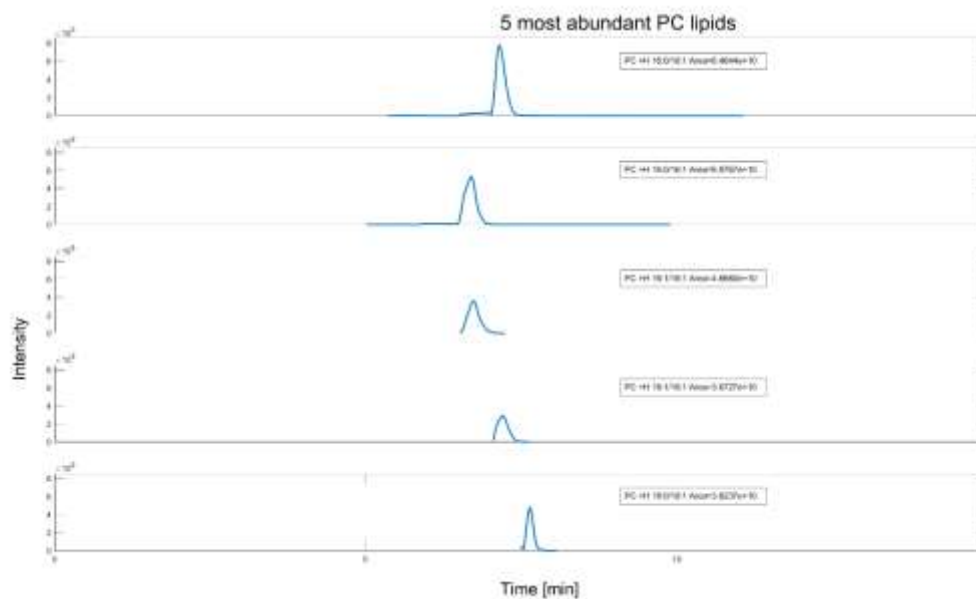

**Figure S4:** Example of LipMat output. LC Chromatogram output of the five most abundant PC lipid species. The chromatogram is scaled to the highest intensity of most abundant lipid species. The area for each lipid is plotted against the retention time where the lipid was identified,  $\pm$  a user-defined retention offset time.

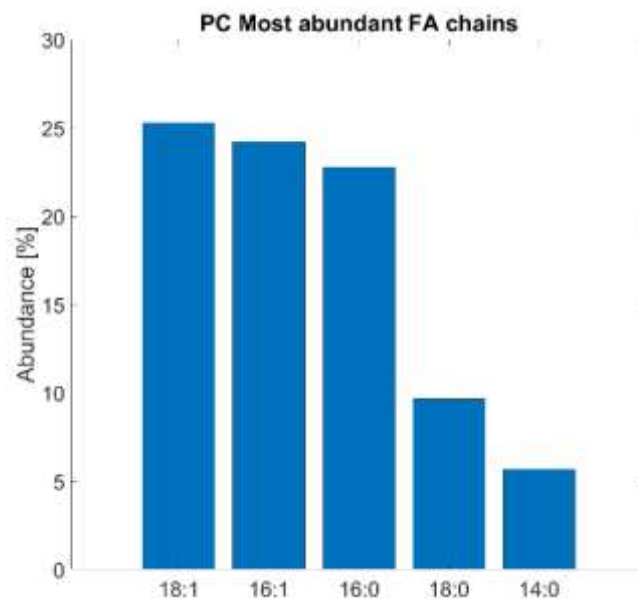

**Figure S5:** Example of LipMat output. The abundance of FA chains of PC headgroups detected in whole cell SH-SY5Y lipid samples. From chromatogram intensities, LipMat assigns abundance for each monitored FA and create a bar plot for the five most abundant FA for each monitored lipid headgroup.

|          | Retention [min] | Flow [ml/min] | %A | %B  | Curve type |
|----------|-----------------|---------------|----|-----|------------|
| <b>1</b> | 0               | 0.4           | 60 | 40  | 5          |
| <b>2</b> | 3               | 0.4           | 30 | 70  | 5          |
| <b>3</b> | 12              | 0.4           | 20 | 80  | 5          |
| <b>4</b> | 15              | 0.4           | 0  | 100 | 5          |
| <b>5</b> | 17              | 0.4           | 0  | 100 | 5          |
| <b>6</b> | 17              | 0.4           | 60 | 40  | 5          |
| <b>7</b> | 20              | 0.4           | 60 | 40  | 5          |

**Table S1:** Optimized multi-step gradient for LC settings during LC-MS/MS runs. Settings are valid for Dionex Ultimate 3000 UPLC using an Acquity UPLC HSS C18 column, 2.1 mm x 100 mm (Waters, USA). Buffer A (40% acetonitrile, 60% water), and of buffer B (10% acetonitrile, 90% isopropanol) were both supplemented with 10 mM ammonium acetate.

| Lipid_species       | Mean_mz     | ppm_of_mz   | Number_of_hits | Mean_score  | STD_Score   | Sum_of_score | Mean_of_retention_time | STD_of_retention_time | Lipid_headgroup |
|---------------------|-------------|-------------|----------------|-------------|-------------|--------------|------------------------|-----------------------|-----------------|
| PC Lyso +H 16:0/0:0 | 496.342907  | 1.53835194  | 24             | 28.67932944 | 2.642840992 | 688.3039066  | 2.009775694            | 0.247818648           | PC              |
| PC Lyso +H 18:1/0:0 | 522.3590078 | 0.974157412 | 22             | 30.87219062 | 3.168932211 | 679.1881937  | 2.169001515            | 0.221999771           | PC              |
| PC +H 16:0/18:1     | 760.5867456 | 0.956078041 | 12             | 30.07056284 | 9.417942066 | 360.8467541  | 8.215118056            | 2.373897092           | PC              |
| PC +H 16:0/16:1     | 732.5555074 | 1.807295292 | 10             | 31.46908132 | 8.78208572  | 314.6908132  | 7.392963333            | 2.045586071           | PC              |
| PC +H 16:1/16:1     | 730.540441  | 1.048192152 | 9              | 30.79034663 | 5.259627589 | 277.1131197  | 6.211035185            | 0.112971467           | PC              |
| PC +H 18:1/18:1     | 786.6012104 | 1.572863445 | 8              | 31.86024269 | 5.042466847 | 254.8819415  | 7.231804167            | 0.105816086           | PC              |
| PC +H 16:1/18:1     | 758.5693459 | 0.56573319  | 7              | 37.84106527 | 11.33469794 | 264.8874569  | 6.684759524            | 0.080731171           | PC              |
| PC +H 14:0/16:1     | 704.5250816 | 0.389549711 | 7              | 36.74751835 | 8.937795471 | 257.2326285  | 6.052940476            | 0.105664891           | PC              |
| PC +H 18:0/18:1     | 788.6198698 | 1.972241597 | 6              | 26.53068153 | 3.061259378 | 159.1840892  | 7.689277778            | 0.078547915           | PC              |
| PC +H 16:0/16:0     | 734.5711249 | 0.621000872 | 5              | 33.83771426 | 3.791874529 | 169.1885713  | 7.150163333            | 0.052844865           | PC              |
| PC +H 16:0/17:1     | 746.5722697 | 0.5263939   | 5              | 30.64144137 | 7.369723608 | 153.2072068  | 6.918266667            | 0.068256914           | PC              |
| PC +H 17:1/18:1     | 772.5869026 | 0.652062716 | 5              | 30.00759539 | 6.107289706 | 150.037977   | 6.955803333            | 0.063807338           | PC              |
| SM +H d18:1/24:1    | 813.6906786 | 1.030316929 | 5              | 29.6473189  | 4.531820771 | 148.2365945  | 8.09453                | 0.052573096           | SM              |
| PC +H 14:0/16:0     | 706.5406102 | 2.112613634 | 5              | 28.89937251 | 12.48517782 | 144.4968626  | 6.575413333            | 0.06858462            | PC              |
| PC +H 15:0/18:1     | 746.575039  | 2.513935817 | 5              | 24.04735095 | 3.195346999 | 120.2367548  | 7.60878                | 0.399661749           | PC              |
| PC +H 18:1/18:2     | 784.5848904 | 0.285096432 | 4              | 35.22308757 | 14.1505026  | 140.8923503  | 6.7480875              | 0.041455432           | PC              |
| PC +H 14:0/14:0     | 678.5097961 | 0.416195585 | 4              | 34.3359483  | 3.204391353 | 137.3437932  | 5.931216667            | 0.044065948           | PC              |
| PC +H 16:0/18:0     | 762.6036814 | 0.492333797 | 4              | 34.09527812 | 6.417566159 | 136.3811125  | 7.635520833            | 0.041700556           | PC              |
| PC +H 18:1/20:1     | 814.6333708 | 0.981297234 | 4              | 26.08475545 | 6.142532472 | 104.3390218  | 7.635591667            | 0.044124853           | PC              |
| SM +H d18:1/24:0    | 815.7074718 | 0.488827031 | 4              | 24.90188345 | 1.173226951 | 99.6075338   | 8.556258333            | 0.044864565           | SM              |
| PC +H 16:0/20:3     | 784.5873742 | 0.122556685 | 3              | 33.83476767 | 10.00347802 | 101.504303   | 7.033227778            | 0.03359477            | PC              |
| PC +H 16:0/16:2     | 730.5422277 | 0.486176005 | 3              | 29.72204825 | 5.869125638 | 89.16614475  | 6.441394444            | 0.034133335           | PC              |
| PC +H 14:0/18:1     | 732.5557526 | 1.875970957 | 3              | 29.5567686  | 5.760505905 | 88.6703058   | 6.679716667            | 0.20713456            | PC              |
| SM +Na d14:0/26:0   | 811.6716198 | 3.067374554 | 3              | 24.69679935 | 0.934580921 | 74.09039804  | 7.71705                | 0.051779922           | SM              |
| PE +H 18:0/18:1     | 746.5754442 | 0.537645194 | 3              | 24.59394146 | 0.47941201  | 73.78182438  | 7.769483333            | 0.032596425           | PE              |
| PC +Na 16:0/18:1    | 782.5671098 | 0.783984629 | 2              | 39.07852593 | 1.804038367 | 78.15705187  | 7.170833333            | 0.022603847           | PC              |
| PC +Na 18:0/18:1    | 810.5991174 | 0.25394568  | 2              | 37.61863166 | 0.156318003 | 75.23726332  | 7.652591667            | 0.024029845           | PC              |
| PC +H 16:0/19:1     | 774.6035542 | 0.643079126 | 2              | 35.79536193 | 0.064500006 | 71.59072386  | 7.366683333            | 0.022273864           | PC              |
| PC +H 16:0/18:4     | 754.5363656 | 0.563350114 | 2              | 34.39936194 | 0.810794741 | 68.79872388  | 6.734625               | 0.024949084           | PC              |
| PC Lyso +H 18:0/0:0 | 524.3751071 | 0.823744275 | 2              | 28.06032148 | 0.196620403 | 56.12064297  | 3.215033333            | 0.025337993           | PC              |
| PC +H 17:0/18:1     | 774.6031033 | 1.438154204 | 2              | 26.46392069 | 4.061873433 | 52.92784139  | 7.358533333            | 0.077381052           | PC              |
| PS +H 18:0/18:1     | 790.5610198 | 1.395734612 | 2              | 25.1120339  | 0.209615771 | 50.2240678   | 7.068108333            | 0.024807663           | PS              |
| PC +H 18:1/19:1     | 800.6186608 | 0.10274194  | 2              | 24.12718839 | 0.371199509 | 48.25437678  | 7.401375               | 0.047741493           | PC              |
| PC Lyso +H 30:0/0:0 | 692.5614558 | 0.152770297 | 2              | 24.00812369 | 0.07443844  | 48.01624738  | 6.932425               | 0.022521351           | PC              |
| PC +H 16:1/18:2     | 756.556524  | 0.555021435 | 2              | 23.84694133 | 0.099302124 | 47.69388267  | 6.323466667            | 0.024159482           | PC              |
| PC +H 16:0/22:3     | 812.6183208 | 0.55825885  | 2              | 23.615976   | 1.98649962  | 47.23195201  | 7.492066667            | 0.133383909           | PC              |
| PC +H 18:1/20:2     | 812.6169462 | 0           | 1              | 36.29976185 | 0           | 36.29976185  | 7.23905                | 0                     | PC              |

**Table S2:** Example of LipMat table output. Results are for lipid identification of positive LC-MS/MS data-dependent analysis of a whole cell SH-SYS5 sample, iterative exclusion run 1. All uniquely identified lipid species are listed with additional information, including a number of hits in spectra, mean score for all hits and the mean retention time, where hits were observed. For scores <30, the lipid presence should be critically checked against generated fragmentation plots (Figure S3).
